# Supplementary material for: Insight into the role of nitrogen in N-doped ordered mesoporous carbons for the spontaneous non-covalent attachment and electrografting of redox-active materials
Source: Royal Society of Chemistry journal article supplement (doi:10.1039/d3an00176h), 2023-01-01
Supplement: d3an00176h1.pdf [file d3an00176h1.pdf]

## Supporting Information

### **Insight into the Role of Nitrogen in N-Doped Ordered Mesoporous Carbons for Spontaneous Non-covalent Attachment and Electrografting of Redox Active Materials**

Nasim Shamsvand<sup>a</sup>, Fahimeh Varmaghani<sup>\*a,b</sup>, Babak Karimi<sup>\*a,b</sup>, Hamzeh Hassanaki

*<sup>a</sup>Department of Chemistry, Institute for Advanced Studies in Basic Sciences (IASBS), Zanjan  
45137-66731, Iran*

*<sup>b</sup>Research Center for Basic Sciences and Modern Technologies (RBST), Institute for Advanced  
Studies in Basic Sciences (IASBS), Zanjan 45137-66731, Iran*

## Contents

|                                                                                       |         |
|---------------------------------------------------------------------------------------|---------|
| Fig. S1. The effect of scan rate on the voltammogram of catechol on GIOMC/GCE         | Page 3  |
| Fig. S2. <sup>1</sup> HNMR spectra of the NBPh                                        | Page 4  |
| Fig. S3. Simulated <sup>1</sup> HNMR spectra of the NBPh                              | Page 5  |
| Fig. S4. Simulated <sup>1</sup> HNMR spectra of the NBPh'                             | Page 6  |
| Fig. S5. <sup>13</sup> CNMR spectra of the NBPh                                       | Page 7  |
| Fig. S6. IR spectra of the NBPh                                                       | Page 8  |
| Scheme 1. Two different pathways for the nitration of BPh                             | Page 9  |
| Fig. S7. Cyclic voltammograms of NBPh in the absence and gradual increasing of BPh    | Page 10 |
| Fig. S8. (I) Cyclic voltammograms and (II) of logi-logv of BPh/GIOMC/GC               | Page 11 |
| Fig. S9. Cyclic voltammograms of the products resulted from the nitration of catechol | Page 12 |
| Fig. S10. GIOMC in acidic solution                                                    | Page 13 |
| Fig. S11: Cyclic voltammograms of catechol and ferrocyanide on the GIOMC/GCE          | Page 14 |

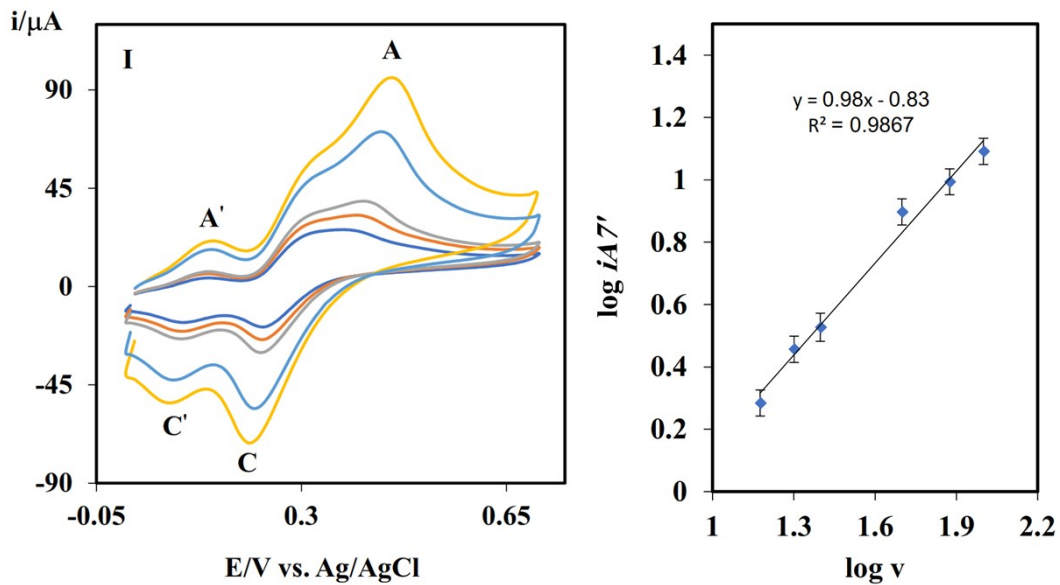

**Figure S1:** (I) Cyclic voltammograms of 2 mM catechol on GIOMC/GC electrode in aqueous solution with pH of 6 at different scan rates, (II) The plot of logi-logv for voltammograms in Part I. Reference electrode: Ag/AgCl.

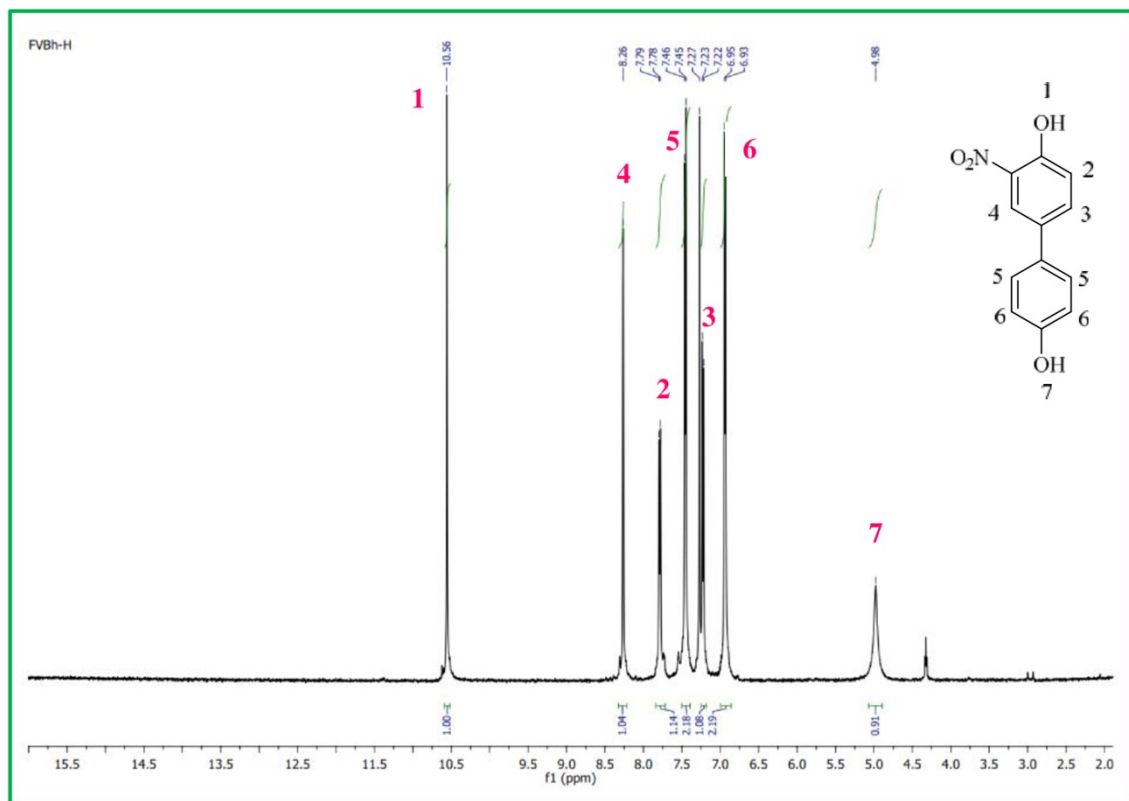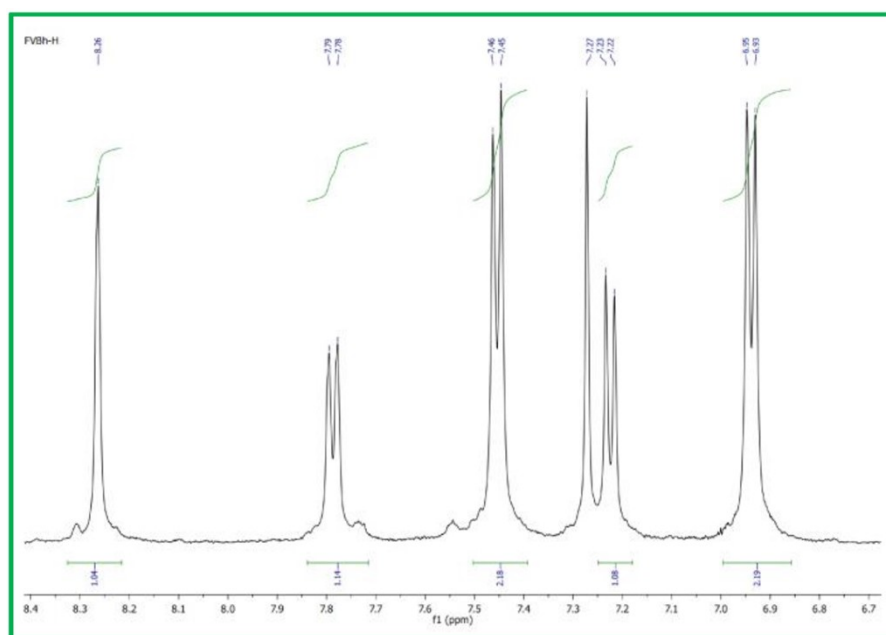

**Fig. S2.** <sup>1</sup>H NMR spectra of the NBPh

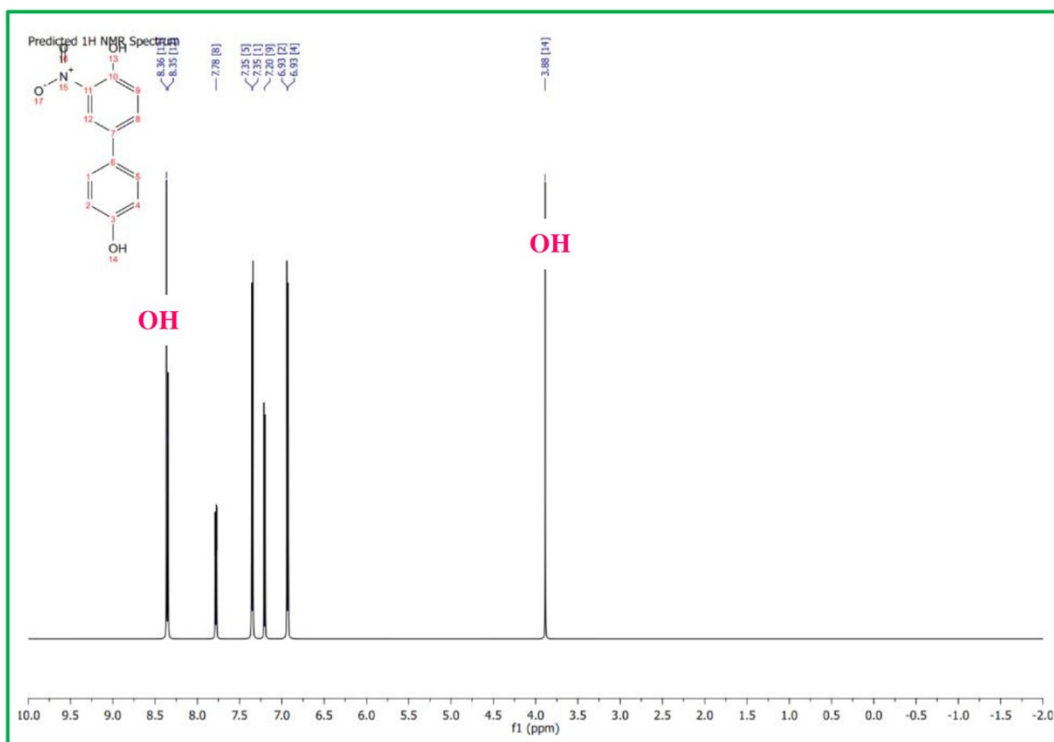

**Fig. S3.** Simulated  $^1\text{H}$ NMR spectra of the NBPh

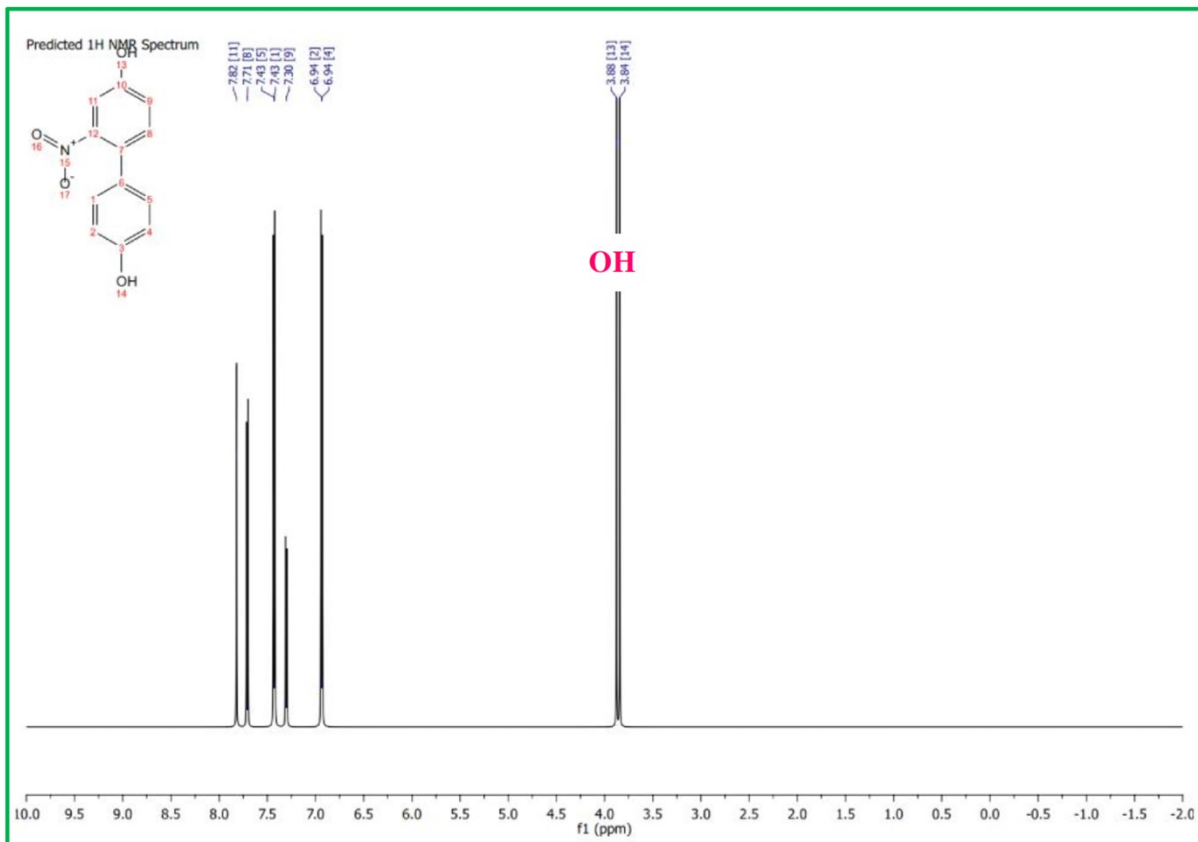

**Fig. S4.** Simulated  $^1\text{H}$ NMR spectra of the NBPh'

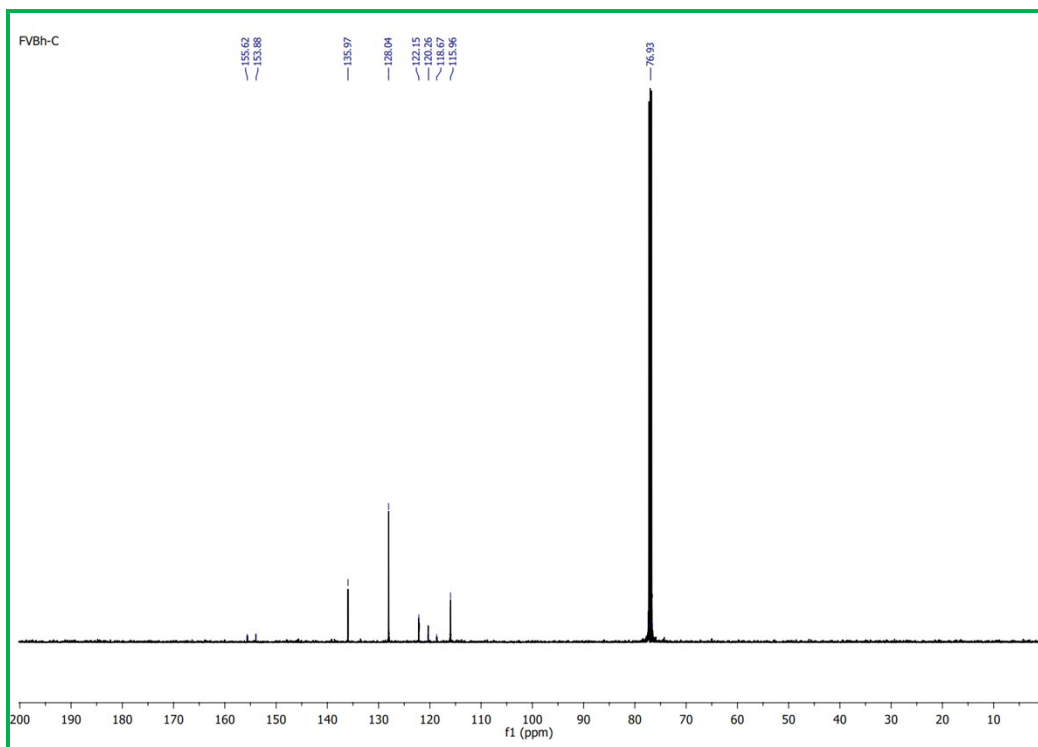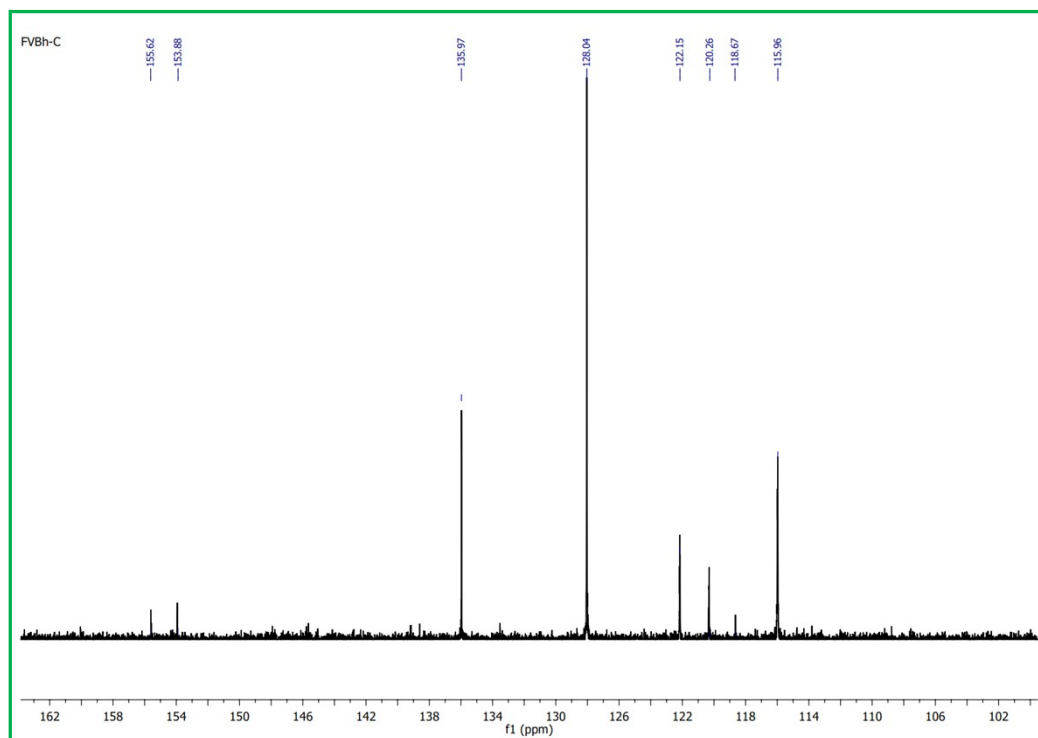

**Fig. S5.**  $^{13}\text{C}$ NMR spectra of the NBPh

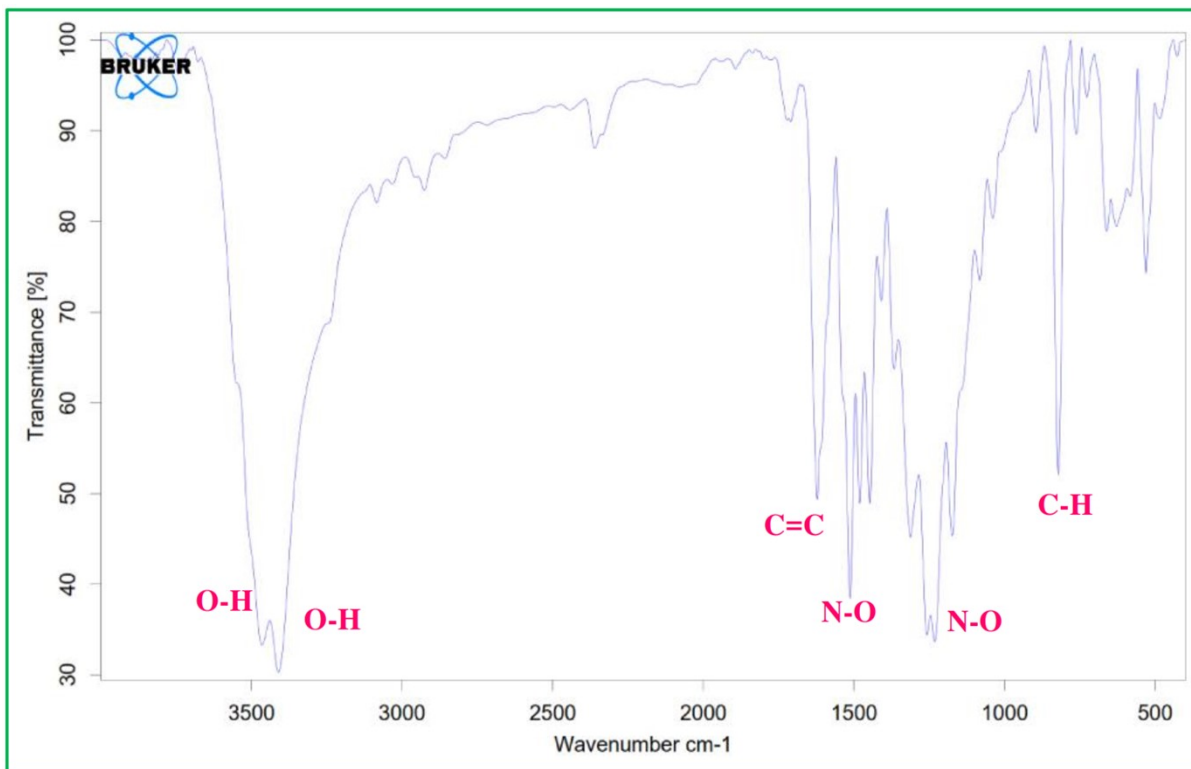

**Fig. S6.** IR spectra of the NBPh



The product of nitration of BPh was characterized by spectroscopic data (Figs. S2, S5 and S6). The appearance of a singlet signal in  $^1\text{H NMR}$  (Fig. 2S) at 8.26 ppm clearly confirms the substitution of a nitro functional group on the phenyl ring. It should also be noted that two possible pathways are considered for nitration of the aromatic ring (Scheme S1). A Comparison between the simulated spectra of NBPh (Fig. S3) and NBPh' (Fig. S4) with the experimental results implies that NBPh has been produced as the final product.

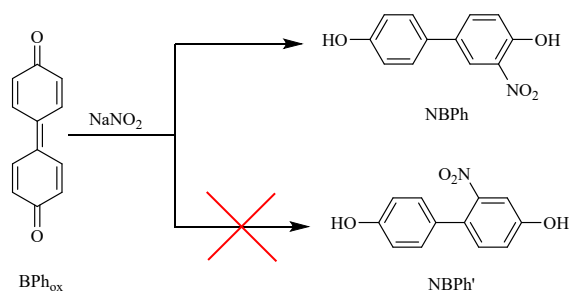

**Scheme S1:** Two different pathways for the nitration of BPh

In order to make a better comparison between the electrochemical behavior of BPh and NBPh, the voltammetry of 1 mM NBPh was also conducted through the consecutive addition of BPh followed by exerting different potential window from -1 to +0.9 V (Fig. S7I) and 0 to +1 V (Fig. S7II). Appearance and gradual increase the height of  $A_1/C_1$  corresponded to BPh electrode process clearly highlights the notion that the oxidation potential of BPh is to some extent lower than that observed for NBPh. More difficult oxidation of NBPh, as expected, is due to the presence of electron-withdrawing nitro group in close proximity to the redox center of the molecule.

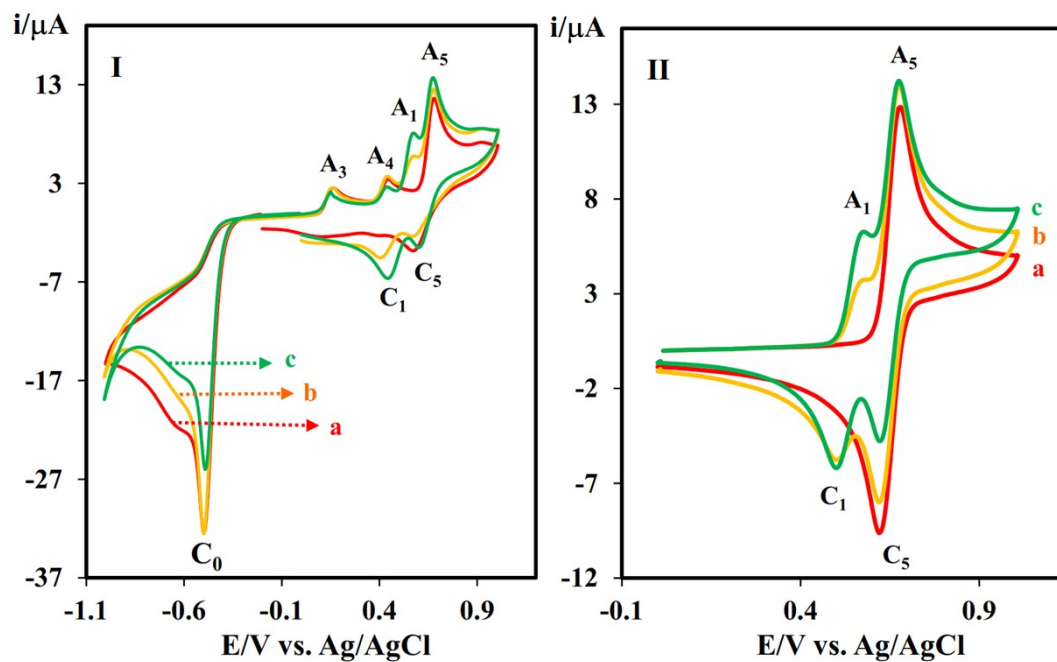

**Fig. S7.** Cyclic voltammograms of 1 mM NBPh (a) in the absence and (b and c) by gradual increasing of BPh.

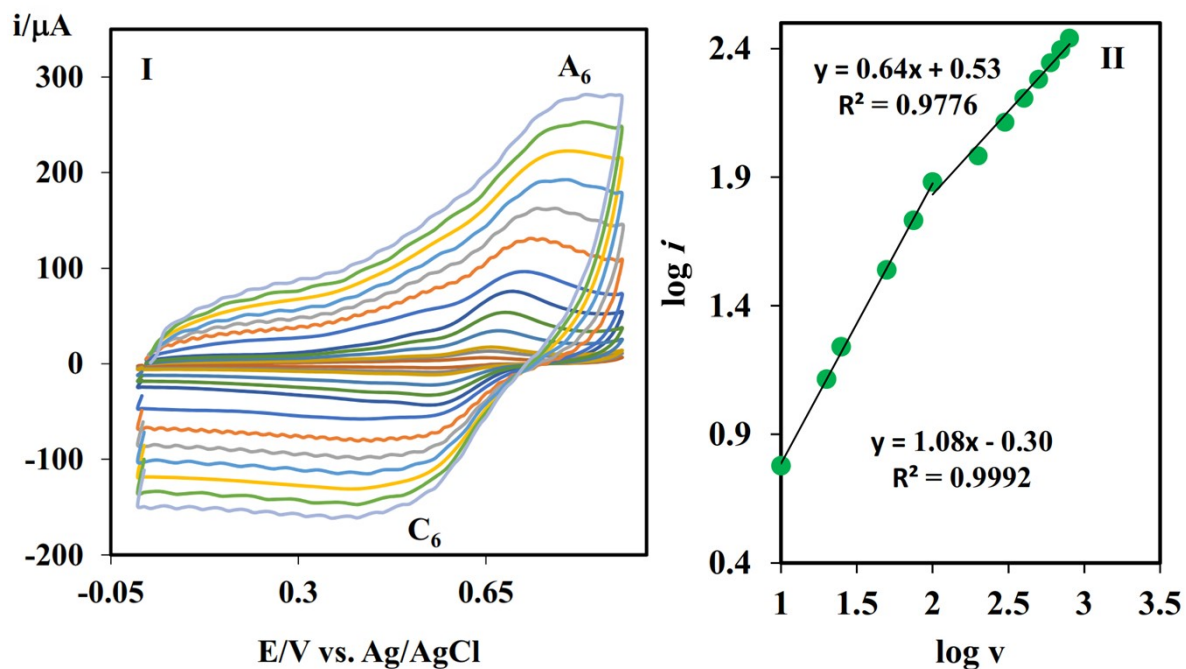

**Fig. S8.** (I) Cyclic voltammograms of BPh/GIOMC/GC in aqueous phosphate buffer solution at different scan rates, Reference electrode: Ag/AgCl (II) the plot of log $i$ -log $v$  for  $A_6$

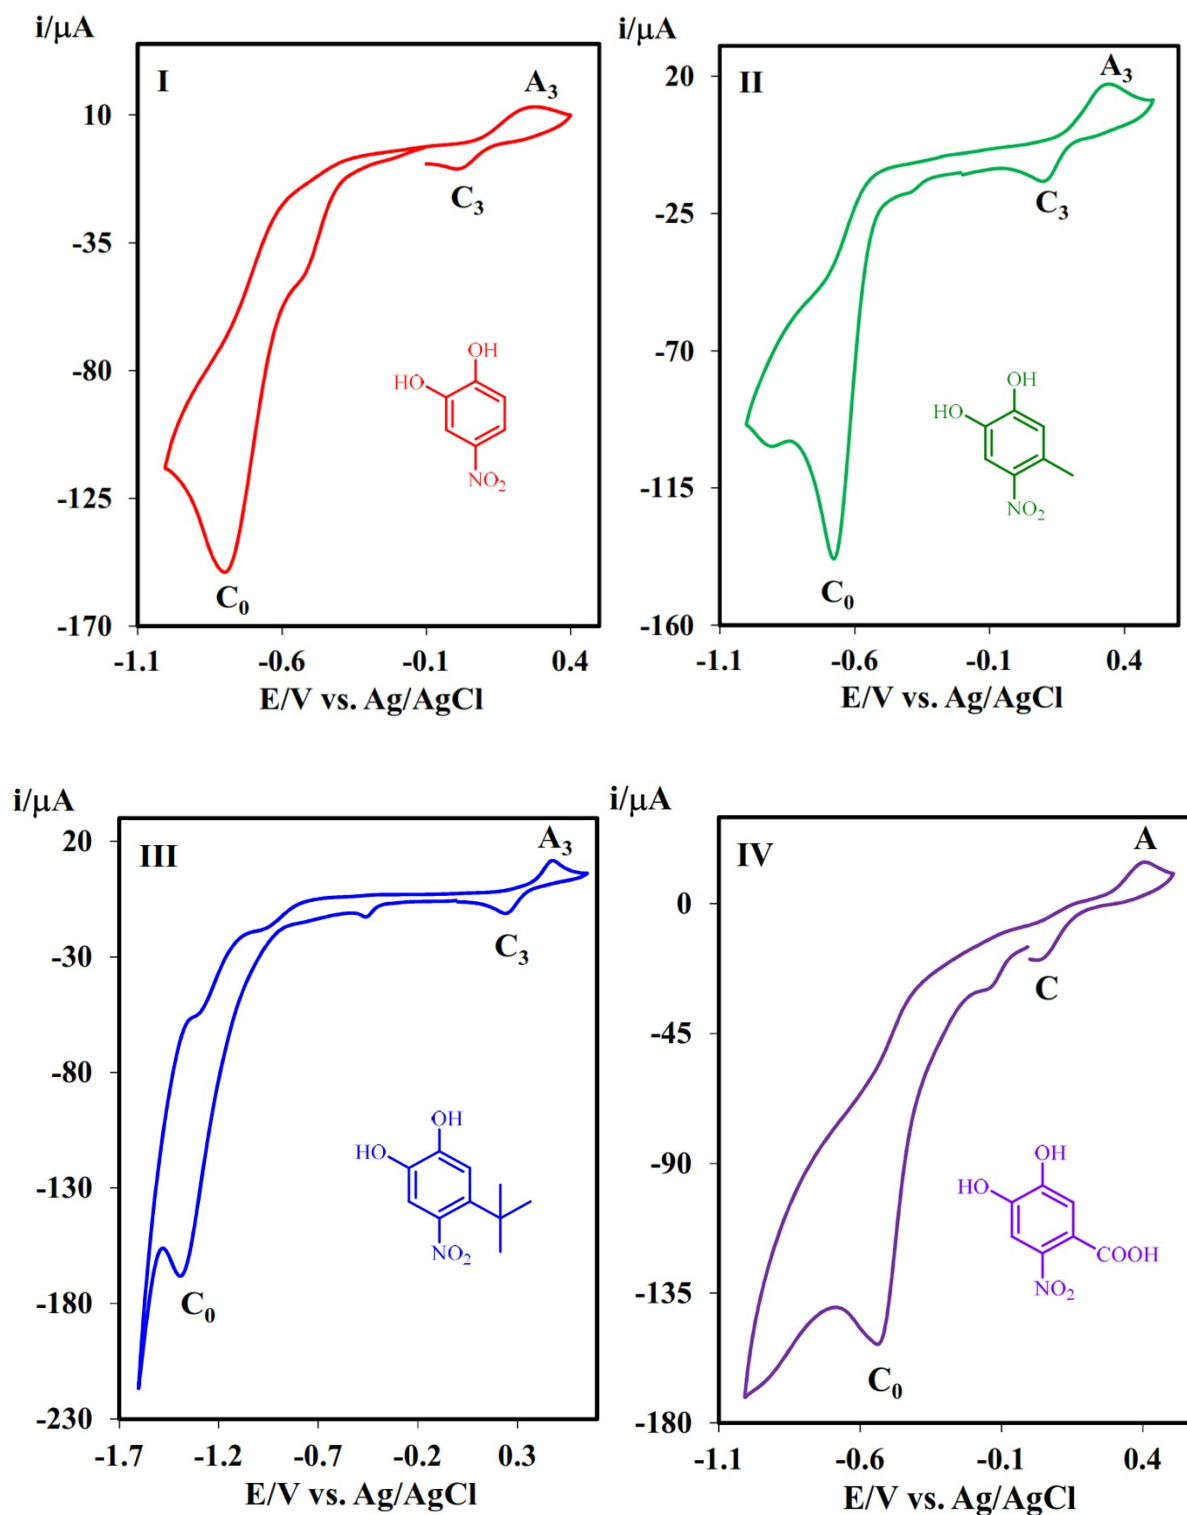

Fig. S9. Cyclic voltammograms of the products resulted from the nitration of catechols,

Reference electrode:  $\text{Ag}/\text{AgCl}$

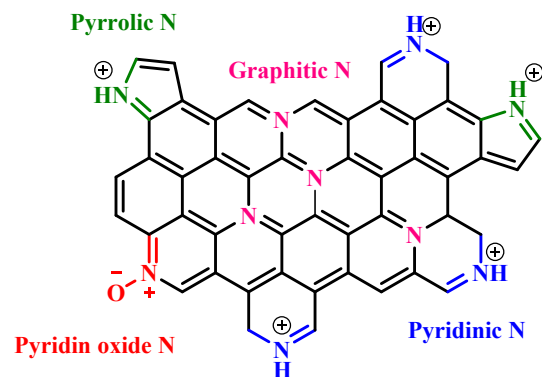

**Fig. S10.** GIOMC in acidic solution

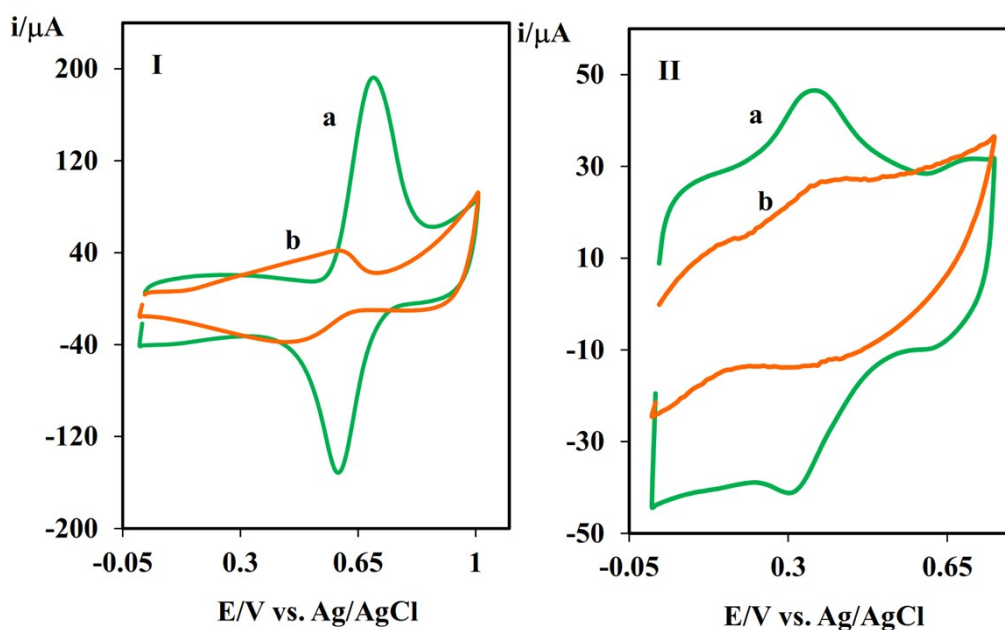

**Fig. S11:** Cyclic voltammogram of 2 mM solution of I) catechol, II) ferrocyanide on the electrode surface modified with GIOMC in a) 0.1 M HCl solution and b) 0.1 M KCl solution, Reference electrode: Ag/AgCl.
